# Supplementary material for: Cost of Recommended Diet (CoRD) and Its Affordability in Bangladesh
Source: MDPI journal article supplement (doi:10.3390/foods12040790), 2023-02-13
Supplement: s1 [file s1]

## Supplementary Files

**Table S1:** List of two least-cost items under each food group

| Food group           | Name of divisions | Two least-expensive food items appearing under each food group in calculating the cost of a healthy diet |
|----------------------|-------------------|----------------------------------------------------------------------------------------------------------|
| Cereals              | Dhaka             | Wheat, rice flakes                                                                                       |
|                      | Chittagong        | Wheat, rice                                                                                              |
|                      | Mymensingh        | Wheat, rice flakes                                                                                       |
|                      | Barisal           | Wheat, rice                                                                                              |
|                      | Rajshahi          | Wheat, rice                                                                                              |
|                      | Rangpur           | Wheat, rice                                                                                              |
|                      | Sylhet            | Wheat, rice                                                                                              |
|                      | Khulna            | Wheat, rice                                                                                              |
| Pulses               | Dhaka             | Bengal gram, lentil                                                                                      |
|                      | Chittagong        | Bengal gram, lentil                                                                                      |
|                      | Mymensingh        | Bengal gram, black gram                                                                                  |
|                      | Barisal           | Bengal gram, lentil                                                                                      |
|                      | Rajshahi          | Bengal gram, lentil                                                                                      |
|                      | Rangpur           | Bengal gram, lentil                                                                                      |
|                      | Sylhet            | Bengal gram, lentil                                                                                      |
|                      | Khulna            | Bengal gram, lentil                                                                                      |
| Non-leafy vegetables | Dhaka             | Potato, radish                                                                                           |
|                      | Chittagong        | Potato, radish                                                                                           |
|                      | Mymensingh        | Bottle gourd, radish                                                                                     |
|                      | Barisal           | Potato, radish                                                                                           |

|                    |            |                                          |
|--------------------|------------|------------------------------------------|
|                    | Rajshahi   | Bottle gourd, cabbage                    |
|                    | Rangpur    | Radish, cabbage                          |
|                    | Sylhet     | Potato, cabbage                          |
|                    | Khulna     | Brinjal, radish                          |
| Leafy vegetables   | Dhaka      | Radish leaves, green amaranth leaves     |
|                    | Chittagong | Jute leaves, radish leaves               |
|                    | Mymensingh | Jute leaves, pumpkin leaves              |
|                    | Barisal    | Radish leaves, red amaranth leaves       |
|                    | Rajshahi   | Bottle gourd leaves, red amaranth leaves |
|                    | Rangpur    | Water spinach, radish leaves             |
|                    | Sylhet     | Green amaranth leaves, Indian spinach    |
|                    | Khulna     | Radish leaves, spiny amaranth leaves     |
| Fruits             | Dhaka      | Melon, carambola                         |
|                    | Chittagong | Banana, hog plum                         |
|                    | Mymensingh | Carambola, jujube                        |
|                    | Barisal    | Carambola, melon                         |
|                    | Rajshahi   | Carambola, papaya                        |
|                    | Rangpur    | Carambola, banana                        |
|                    | Sylhet     | Carambola, guava                         |
|                    | Khulna     | Carambola, hog plum                      |
| Meat, fish and egg | Dhaka      | Pool barb, egg                           |
|                    | Chittagong | Catfish, egg                             |
|                    | Mymensingh | Pool barb, egg                           |
|                    | Barisal    | Pool barb, egg                           |
|                    | Rajshahi   | Egg, silver carp                         |

|                        |            |                               |
|------------------------|------------|-------------------------------|
|                        | Rangpur    | Silver carp, egg              |
|                        | Sylhet     | Pool barb, egg                |
|                        | Khulna     | Egg, chicken meat             |
| Milk and milk products | Dhaka      | Cow's milk, condensed milk    |
|                        | Chittagong | Cow's milk, condensed milk    |
|                        | Mymensingh | Cow's milk, condensed milk    |
|                        | Barisal    | Condensed milk, cow's milk    |
|                        | Rajshahi   | Powdered milk, condensed milk |
|                        | Rangpur    | Cow's milk, condensed milk    |
|                        | Sylhet     | Cow's milk, condensed milk    |
|                        | Khulna     | Condensed milk, powdered milk |
| Fats and oils          | Dhaka      | Soya oil, palm oil            |
|                        | Chittagong | Palm oil, soya oil            |
|                        | Mymensingh | Palm oil, soya oil            |
|                        | Barisal    | Soya oil, palm oil            |
|                        | Rajshahi   | Palm oil, coconut             |
|                        | Rangpur    | Palm oil, soya oil            |
|                        | Sylhet     | Soya oil, palm oil            |
|                        | Khulna     | Soya oil, palm oil            |
| Sugar                  | Dhaka      | Sugar, jaggery                |
|                        | Chittagong | Sugar, jaggery                |
|                        | Mymensingh | Sugar, jaggery                |
|                        | Barisal    | Sugar, jaggery                |
|                        | Rajshahi   | Sugar, jaggery                |
|                        | Rangpur    | Sugar, jaggery                |

|        |                |
|--------|----------------|
| Sylhet | Sugar, jaggery |
| Khulna | Sugar, jaggery |

**Table S2:** District-wise estimates of the proportion of households unable to afford the CoRD

| <b>District</b> | <b>Proportion (95% CI)</b> |
|-----------------|----------------------------|
| Bagerhat        | 57.5 (53.9–61.1)           |
| Bandarban       | 64.3 (60.8–67.9)           |
| Barguna         | 29.8 (26.4–33.1)           |
| Barisal         | 40.4 (36.8–44.0)           |
| Bhola           | 16.7 (14.0–19.5)           |
| Bogra           | 46.8 (43.1–50.5)           |
| Brahmanbaria    | 11.6 (9.2–13.9)            |
| Chandpur        | 25.8 (22.6–29.0)           |
| Chapainawabganj | 70.1 (66.8–73.5)           |
| Chattagram      | 28.5 (25.2–31.8)           |
| Chuadanga       | 67.1 (63.6–70.6)           |
| Cumilla         | 14.3 (11.7–16.8)           |
| Cox's Bazar     | 9.3 (7.2–11.4)             |
| Dhaka           | 16.7 (14.0–19.4)           |
| Dinajpur        | 67.5 (64.1–70.9)           |
| Faridpur        | 18.6 (15.8–21.5)           |
| Feni            | 21.5 (18.4–24.5)           |
| Gaibandha       | 53.6 (49.9–57.2)           |
| Gazipur         | 18.4 (15.5–21.2)           |

|              |                  |
|--------------|------------------|
| Gopalganj    | 44.6 (40.9–48.2) |
| Habiganj     | 44.8 (41.1–48.4) |
| Jamalpur     | 66.3 (62.8–69.7) |
| Jashore      | 64.8 (61.3–68.3) |
| Jhalakathi   | 33.4 (30.0–36.9) |
| Jhenaidah    | 68.1 (64.6–71.5) |
| Joypurhat    | 48.0 (44.3–51.6) |
| Khagrachhari | 45.3 (41.7–49.0) |
| Khulna       | 68.4 (65.0–71.8) |
| Kishoreganj  | 59.7 (56.1–63.3) |
| Kurigram     | 75.4 (72.2–78.6) |
| Kushtia      | 57.2 (53.6–60.8) |
| Lakshmipur   | 25.0 (21.8–28.2) |
| Lalmonirhat  | 35.6 (32.1–39.1) |
| Madaripur    | 11.4 (9.1–13.7)  |
| Magura       | 71.4 (68.1–74.7) |
| Manikganj    | 56.3 (52.6–59.9) |
| Moulvibazar  | 31.2 (27.8–34.6) |
| Meherpur     | 75.5 (72.3–78.6) |
| Munsiganj    | 22.1 (19.1–25.2) |
| Mymensingh   | 41.7 (38.1–45.3) |
| Naogaon      | 49.3 (45.6–53.0) |
| Narail       | 61.6 (58.1–65.2) |
| Narayanganj  | 10.1 (7.9–12.4)  |
| Narsingdi    | 16.9 (14.1–19.7) |

|            |                  |
|------------|------------------|
| Natore     | 36.0 (32.5–39.5) |
| Netrakona  | 47.2 (43.6–50.9) |
| Nilphamari | 34.5 (31.0–38.0) |
| Noakhali   | 21.8 (18.8–24.9) |
| Pabna      | 37.9 (34.4–41.5) |
| Panchagar  | 30.7 (27.3–34.1) |
| Patuakhali | 37.8 (34.2–41.4) |
| Pirojpur   | 54.9 (51.2–58.5) |
| Rajbari    | 57.4 (53.8–61.1) |
| Rajshahi   | 39.5 (35.9–43.2) |
| Rangamati  | 13.4 (10.9–15.8) |
| Rangpur    | 49.7 (46.1–53.4) |
| Satkhira   | 64.6 (61.1–68.1) |
| Shariatpur | 27.5 (24.2–30.8) |
| Sherpur    | 34.2 (30.7–37.6) |
| Sirajganj  | 37.2 (33.7–40.8) |
| Sunamganj  | 60.0 (54.6–63.6) |
| Sylhet     | 25.1 (21.9–28.3) |
| Tangail    | 36.2 (32.7–39.7) |
| Thakurgaon | 33.4 (29.8–36.7) |
